# Supplementary material for: Measuring biological age in mice using differential mass spectrometry
Source: publisher site journal article supplement (doi:10.18632/aging.101810), 2019-02-11
Supplement: Supplementary file [file aging-v11i3-101810-supplementary-material-SD2.pdf]

**Supplementary Table 1. Details on the number of liver samples used for the initial proteomics analysis.**

| Genotype:     | WT                              | WT                                             | WT                                        | WT                                        | WT                                        | <i>Ercc1</i> <sup>-/-</sup>               | <i>Ercc1</i> <sup>-/-</sup>               |
|---------------|---------------------------------|------------------------------------------------|-------------------------------------------|-------------------------------------------|-------------------------------------------|-------------------------------------------|-------------------------------------------|
| Strain:       | C57B6/Jni<br>a<br><b>inbred</b> | C57BL6/Jnia:<br>Balb/cBy<br><b>f1 hybrid a</b> | C57BL/6J:<br>FVB/NJ<br><b>f1 hybrid b</b> | C57BL/6J:<br>FVB/NJ<br><b>f1 hybrid b</b> | C57BL/6J:<br>FVB/NJ<br><b>f1 hybrid b</b> | C57BL/6J:<br>FVB/NJ<br><b>f1 hybrid b</b> | C57BL/6J:<br>FVB/NJ<br><b>f1 hybrid b</b> |
| Sex:          | Male                            | Male                                           | Female                                    | Male                                      | Female                                    | Male                                      | Female                                    |
| Age (mths):   |                                 |                                                |                                           |                                           |                                           |                                           |                                           |
| 2             |                                 |                                                |                                           | 3                                         | 2                                         | 3                                         | 5                                         |
| 3             |                                 |                                                |                                           | 1                                         | 2                                         | 8                                         | 5                                         |
| 4             |                                 |                                                |                                           | 3                                         | 3                                         | 5                                         | 7                                         |
| 7             |                                 |                                                | 9                                         |                                           |                                           |                                           |                                           |
| 8             | 8                               | 7                                              |                                           |                                           |                                           |                                           |                                           |
| 14            |                                 |                                                | 6                                         |                                           |                                           |                                           |                                           |
| 16            | 8                               | 8                                              |                                           |                                           |                                           |                                           |                                           |
| 24            | 7                               | 8                                              | 7                                         |                                           |                                           |                                           |                                           |
| 30            |                                 |                                                | 3                                         |                                           |                                           |                                           |                                           |
| 32            | 8                               | 8                                              |                                           |                                           |                                           |                                           |                                           |
| 36            |                                 | 6                                              |                                           |                                           |                                           |                                           |                                           |
| <b>Total:</b> | 31                              | 37                                             | 25                                        | 7                                         | 7                                         | 16                                        | 17                                        |

**Supplementary Table 2. The table delineates the number of liver samples used in the initial set of experiments.** Quantified features are the number of mass spectrometric signals that passed occupancy and outlier filtering. Identified features are those with an identification associated with a peptide and a protein. One-way ANOVA analysis across the lifespan measures of the various age groups of samples is shown at varying significances. Minimum significance cutoff for a false discover rate of less than 5% is shown in red.

|                     | Total all groups | WT male inbred | WT male f1a | WT female f1b | <i>Ercc1</i> <sup>-/-</sup> and WT male f1b | <i>Ercc1</i> <sup>-/-</sup> and WT female f1b |
|---------------------|------------------|----------------|-------------|---------------|---------------------------------------------|-----------------------------------------------|
| Number of livers    | 140              | 31             | 37          | 25            | 23                                          | 24                                            |
| Quantified features |                  | 64,657         | 60,653      | 76,683        | 46,292                                      | 49,004                                        |
| Identified features |                  | 34,817         | 34,301      | 35,434        | 28,647                                      | 30,290                                        |
| Quantified proteins | 1,489            | 1,298          | 1,268       | 1,196         | 1,181                                       | 1,238                                         |
| One-way ANOVA:      |                  |                |             |               |                                             |                                               |
| p<0.05              |                  | 316            | 436         | 562           | 266                                         | 173                                           |
| p<0.01              |                  | <b>127</b>     | 222         | 362           | 138                                         | <b>69</b>                                     |
| p<0.001             |                  | 55             | <b>92</b>   | 167           | <b>46</b>                                   | 14                                            |
| p<0.0001            |                  | 23             | 44          | <b>74</b>     | 19                                          | 3                                             |

**Supplementary Table 3. All significant proteins for the male inbred C57BL/6Jnia as determined by one-way ANOVA analysis with a false discovery rate of 5%.** Shown for each protein is the mean expression of that protein at a particular age relative to expression of that protein in C57BL/6Jnia male mice at 8 months of age. The mean expression level is not 1 for all proteins in the 8 month-old mice is that the expression levels were normalized at the feature level. Multiple features or peptides are combined to calculate the expression of a single protein. Therefore the protein expression indicated in the first column, which is the reference population, is not precisely 1.

|              | 8 months |      | 16 months |      | 24 months |      | 32 months |      |
|--------------|----------|------|-----------|------|-----------|------|-----------|------|
|              | Mean     | SEM  | Mean      | SEM  | Mean      | SEM  | Mean      | SEM  |
| AASS         | 0.93     | 0.03 | 0.93      | 0.02 | 0.98      | 0.06 | 1.40      | 0.13 |
| ACAA1B       | 1.15     | 0.07 | 1.17      | 0.09 | 0.95      | 0.12 | 0.78      | 0.06 |
| ACAA2        | 1.06     | 0.02 | 1.03      | 0.02 | 0.94      | 0.04 | 0.88      | 0.06 |
| ACATI        | 1.06     | 0.04 | 1.07      | 0.03 | 0.97      | 0.02 | 0.87      | 0.05 |
| ACOI         | 1.06     | 0.02 | 1.01      | 0.01 | 0.99      | 0.02 | 0.93      | 0.03 |
| ACO2         | 0.95     | 0.02 | 0.98      | 0.02 | 0.98      | 0.03 | 1.11      | 0.03 |
| ACPI         | 0.94     | 0.05 | 1.23      | 0.08 | 0.96      | 0.06 | 0.90      | 0.08 |
| ACSL1        | 1.10     | 0.04 | 1.09      | 0.03 | 0.91      | 0.04 | 0.81      | 0.06 |
| ACSM3        | 0.88     | 0.08 | 0.83      | 0.09 | 1.23      | 0.19 | 1.49      | 0.13 |
| ACTB         | 0.91     | 0.03 | 0.97      | 0.02 | 1.16      | 0.11 | 1.32      | 0.13 |
| ACTN1        | 0.92     | 0.01 | 0.94      | 0.02 | 1.15      | 0.10 | 1.22      | 0.08 |
| ACTN4        | 0.87     | 0.04 | 0.92      | 0.03 | 1.12      | 0.10 | 1.26      | 0.10 |
| ACTRIA       | 0.92     | 0.08 | 0.56      | 0.12 | 1.14      | 0.08 | 1.07      | 0.09 |
| ACTR3        | 0.93     | 0.02 | 0.94      | 0.03 | 1.16      | 0.09 | 1.22      | 0.09 |
| AGL          | 0.98     | 0.03 | 1.08      | 0.05 | 1.10      | 0.07 | 0.84      | 0.06 |
| AKRIC13      | 1.02     | 0.04 | 1.06      | 0.03 | 1.05      | 0.06 | 0.82      | 0.04 |
| AKRIC6       | 1.08     | 0.02 | 1.05      | 0.03 | 0.95      | 0.06 | 0.86      | 0.05 |
| AMT          | 0.88     | 0.04 | 0.92      | 0.06 | 1.10      | 0.04 | 1.14      | 0.05 |
| ANXA6        | 0.87     | 0.02 | 0.96      | 0.03 | 1.07      | 0.05 | 1.20      | 0.08 |
| AOX3         | 1.28     | 0.06 | 1.10      | 0.07 | 0.89      | 0.03 | 0.66      | 0.07 |
| ATP11C       | 1.06     | 0.06 | 1.03      | 0.03 | 0.97      | 0.05 | 0.79      | 0.06 |
| ATP6V1B2     | 0.97     | 0.06 | 0.82      | 0.05 | 1.02      | 0.09 | 1.27      | 0.10 |
| BC021614     | 1.42     | 0.07 | 0.95      | 0.09 | 0.86      | 0.13 | 0.69      | 0.07 |
| CI6ORF1<br>3 | 1.17     | 0.03 | 1.00      | 0.05 | 0.96      | 0.06 | 0.85      | 0.09 |
| CA3          | 1.14     | 0.04 | 1.12      | 0.03 | 0.84      | 0.05 | 0.56      | 0.07 |
| CBS          | 0.89     | 0.01 | 0.97      | 0.04 | 0.98      | 0.03 | 1.22      | 0.05 |
| CCDC47       | 0.93     | 0.04 | 0.92      | 0.06 | 1.08      | 0.08 | 1.31      | 0.08 |
| CERCAM       | 1.56     | 0.10 | 1.03      | 0.07 | 0.85      | 0.13 | 0.40      | 0.09 |
| CES2G        | 1.10     | 0.04 | 1.04      | 0.02 | 0.98      | 0.05 | 0.79      | 0.05 |
| CES3A        | 1.09     | 0.04 | 1.05      | 0.05 | 0.88      | 0.08 | 0.73      | 0.09 |
| CFL1         | 0.94     | 0.02 | 0.97      | 0.03 | 1.12      | 0.06 | 1.13      | 0.05 |
| COMT         | 1.14     | 0.03 | 1.00      | 0.04 | 0.92      | 0.05 | 0.90      | 0.07 |
| CPA4         | 0.96     | 0.14 | 1.25      | 0.06 | 1.15      | 0.09 | 0.70      | 0.06 |
| CROT         | 1.18     | 0.06 | 1.05      | 0.05 | 0.93      | 0.05 | 0.82      | 0.05 |
| CTH          | 0.97     | 0.04 | 0.95      | 0.02 | 0.85      | 0.08 | 1.46      | 0.14 |

|                      | 8 months |      | 16 months |      | 24 months |      | 32 months |      |
|----------------------|----------|------|-----------|------|-----------|------|-----------|------|
|                      | Mean     | SEM  | Mean      | SEM  | Mean      | SEM  | Mean      | SEM  |
| <i>CTSD</i>          | 0.89     | 0.03 | 0.92      | 0.03 | 1.10      | 0.10 | 1.25      | 0.09 |
| <i>CYP2C44</i>       | 0.92     | 0.03 | 0.87      | 0.04 | 1.07      | 0.07 | 1.27      | 0.06 |
| <i>CYP2C68</i>       | 0.83     | 0.06 | 0.96      | 0.10 | 1.15      | 0.14 | 1.45      | 0.12 |
| <i>CYP2C70</i>       | 0.85     | 0.06 | 0.86      | 0.08 | 1.05      | 0.07 | 1.41      | 0.12 |
| <i>CYP2D9</i>        | 1.26     | 0.15 | 1.12      | 0.06 | 0.77      | 0.11 | 0.66      | 0.06 |
| <i>CYP2E1</i>        | 1.01     | 0.02 | 1.10      | 0.05 | 0.96      | 0.05 | 0.85      | 0.06 |
| <i>CYP2F2</i>        | 1.10     | 0.05 | 0.97      | 0.05 | 0.83      | 0.05 | 1.03      | 0.05 |
| <i>CYP4A12<br/>B</i> | 1.19     | 0.07 | 0.93      | 0.04 | 0.86      | 0.05 | 0.98      | 0.05 |
| <i>CYP4V2</i>        | 1.27     | 0.11 | 1.15      | 0.13 | 0.67      | 0.08 | 0.84      | 0.08 |
| <i>DHCR7</i>         | 0.81     | 0.06 | 0.97      | 0.07 | 1.17      | 0.07 | 1.20      | 0.10 |
| <i>DHTKD1</i>        | 0.84     | 0.06 | 0.82      | 0.08 | 1.04      | 0.05 | 1.51      | 0.18 |
| <i>DPYD</i>          | 0.85     | 0.04 | 0.99      | 0.03 | 1.08      | 0.08 | 1.31      | 0.11 |
| <i>ECH1</i>          | 1.05     | 0.04 | 1.15      | 0.05 | 0.97      | 0.02 | 0.84      | 0.04 |
| <i>ECII</i>          | 1.07     | 0.03 | 1.09      | 0.03 | 0.88      | 0.05 | 0.80      | 0.05 |
| <i>EPHX2</i>         | 1.15     | 0.03 | 1.09      | 0.04 | 0.89      | 0.06 | 0.71      | 0.05 |
| <i>FABP1</i>         | 1.10     | 0.07 | 1.24      | 0.06 | 0.93      | 0.08 | 0.54      | 0.05 |
| <i>FDPS</i>          | 0.75     | 0.06 | 1.05      | 0.10 | 1.34      | 0.11 | 1.00      | 0.06 |
| <i>FMO5</i>          | 0.94     | 0.02 | 0.97      | 0.06 | 0.98      | 0.03 | 1.20      | 0.08 |
| <i>FNI</i>           | 0.94     | 0.02 | 0.96      | 0.04 | 0.88      | 0.04 | 1.23      | 0.12 |
| <i>FTH1</i>          | 0.92     | 0.09 | 0.84      | 0.10 | 1.23      | 0.19 | 1.81      | 0.20 |
| <i>FTL1</i>          | 0.87     | 0.09 | 0.76      | 0.07 | 1.19      | 0.09 | 1.99      | 0.33 |
| <i>GADL1</i>         | 1.26     | 0.12 | 1.23      | 0.18 | 1.46      | 0.20 | 0.67      | 0.05 |
| <i>GBE1</i>          | 1.01     | 0.02 | 1.09      | 0.05 | 1.00      | 0.06 | 0.82      | 0.04 |
| <i>GGCX</i>          | 0.83     | 0.04 | 0.96      | 0.04 | 1.23      | 0.13 | 1.17      | 0.07 |
| <i>GLDC</i>          | 1.19     | 0.04 | 0.96      | 0.04 | 0.87      | 0.06 | 0.90      | 0.06 |
| <i>GLO1</i>          | 1.08     | 0.04 | 1.12      | 0.03 | 0.98      | 0.05 | 0.72      | 0.05 |
| <i>GLT28D2</i>       | 0.96     | 0.04 | 1.01      | 0.06 | 0.89      | 0.08 | 1.63      | 0.15 |
| <i>GM4952</i>        | 1.14     | 0.09 | 1.17      | 0.07 | 0.97      | 0.08 | 0.76      | 0.05 |
| <i>GNPNAT1</i>       | 0.90     | 0.03 | 1.00      | 0.05 | 1.01      | 0.04 | 1.13      | 0.04 |
| <i>GOT1</i>          | 0.87     | 0.04 | 0.99      | 0.04 | 1.00      | 0.05 | 1.47      | 0.13 |
| <i>GPD1</i>          | 1.08     | 0.03 | 1.11      | 0.05 | 0.98      | 0.05 | 0.85      | 0.03 |
| <i>GSTAI</i>         | 0.94     | 0.02 | 1.10      | 0.04 | 1.03      | 0.05 | 0.92      | 0.03 |
| <i>GSTM1</i>         | 0.92     | 0.05 | 0.92      | 0.03 | 1.03      | 0.05 | 1.20      | 0.09 |
| <i>GYK</i>           | 0.96     | 0.02 | 1.13      | 0.04 | 1.01      | 0.04 | 0.96      | 0.03 |
| <i>GYS2</i>          | 1.11     | 0.08 | 1.10      | 0.06 | 0.96      | 0.09 | 0.72      | 0.06 |
| <i>HMGCL</i>         | 1.03     | 0.03 | 1.08      | 0.02 | 0.91      | 0.03 | 0.93      | 0.02 |
| <i>HMGCS2</i>        | 1.06     | 0.04 | 1.09      | 0.03 | 0.89      | 0.04 | 0.92      | 0.06 |
| <i>HNRNPD</i>        | 0.94     | 0.05 | 0.89      | 0.05 | 1.19      | 0.10 | 1.26      | 0.12 |
| <i>HSD17B2</i>       | 1.14     | 0.06 | 1.03      | 0.07 | 0.96      | 0.04 | 0.77      | 0.07 |
| <i>INTS7</i>         | 1.29     | 0.13 | 1.12      | 0.05 | 0.73      | 0.07 | 0.76      | 0.11 |
| <i>IQGAP2</i>        | 0.91     | 0.02 | 0.99      | 0.02 | 1.00      | 0.03 | 1.15      | 0.05 |

|                             |             |            |             |            |             |            |             |            |
|-----------------------------|-------------|------------|-------------|------------|-------------|------------|-------------|------------|
| <i>IYD</i>                  | 0.95        | 0.04       | 0.91        | 0.05       | 1.05        | 0.07       | 1.30        | 0.09       |
|                             | 8 months    |            | 16 months   |            | 24 months   |            | 32 months   |            |
|                             | <b>Mean</b> | <b>SEM</b> | <b>Mean</b> | <b>SEM</b> | <b>Mean</b> | <b>SEM</b> | <b>Mean</b> | <b>SEM</b> |
| <i>KEG1</i>                 | 1.15        | 0.04       | 0.99        | 0.06       | 0.92        | 0.06       | 0.84        | 0.08       |
| <i>KRT10</i>                | 0.92        | 0.02       | 0.94        | 0.01       | 1.08        | 0.09       | 1.31        | 0.08       |
| <i>KRT8</i>                 | 0.91        | 0.02       | 0.96        | 0.02       | 1.10        | 0.06       | 1.26        | 0.07       |
| <i>LACTB2</i>               | 1.10        | 0.04       | 1.03        | 0.03       | 0.97        | 0.03       | 0.88        | 0.05       |
| <i>LGALS3B</i><br><i>P</i>  | 0.84        | 0.10       | 0.88        | 0.08       | 0.95        | 0.06       | 1.65        | 0.22       |
| <i>LGALS9</i>               | 0.87        | 0.05       | 0.90        | 0.06       | 1.14        | 0.03       | 1.20        | 0.09       |
| <i>MAN2A1</i>               | 0.88        | 0.06       | 0.78        | 0.06       | 1.35        | 0.13       | 1.24        | 0.11       |
| <i>MAT1A</i>                | 0.77        | 0.05       | 0.80        | 0.08       | 1.15        | 0.14       | 1.47        | 0.14       |
| <i>MAT2A</i>                | 0.75        | 0.03       | 0.96        | 0.06       | 1.10        | 0.07       | 1.52        | 0.12       |
| <i>ME1</i>                  | 1.02        | 0.09       | 1.41        | 0.14       | 1.06        | 0.14       | 0.67        | 0.09       |
| <i>MUP10</i>                | 1.27        | 0.08       | 1.24        | 0.10       | 0.78        | 0.06       | 0.57        | 0.07       |
| <i>MUP3</i>                 | 1.31        | 0.07       | 0.97        | 0.10       | 0.79        | 0.07       | 0.62        | 0.07       |
| <i>NNT</i>                  | 1.08        | 0.15       | 1.34        | 0.13       | 1.37        | 0.11       | 0.69        | 0.11       |
| <i>NPM1</i>                 | 0.90        | 0.03       | 1.05        | 0.04       | 1.37        | 0.18       | 0.87        | 0.05       |
| <i>NXN</i>                  | 0.70        | 0.06       | 1.05        | 0.09       | 1.23        | 0.13       | 1.54        | 0.27       |
| <i>OTC</i>                  | 1.07        | 0.03       | 0.98        | 0.03       | 0.90        | 0.04       | 0.98        | 0.03       |
| <i>PAICS</i>                | 0.92        | 0.03       | 0.91        | 0.05       | 1.04        | 0.11       | 1.36        | 0.05       |
| <i>PEPD</i>                 | 0.99        | 0.05       | 0.90        | 0.08       | 0.95        | 0.10       | 1.30        | 0.09       |
| <i>PKLR</i>                 | 1.04        | 0.06       | 1.07        | 0.09       | 1.22        | 0.09       | 0.78        | 0.07       |
| <i>PLS3</i>                 | 0.88        | 0.02       | 0.99        | 0.03       | 1.03        | 0.04       | 1.15        | 0.06       |
| <i>PONI</i>                 | 0.95        | 0.05       | 0.93        | 0.05       | 0.95        | 0.06       | 1.26        | 0.06       |
| <i>POR</i>                  | 0.87        | 0.02       | 0.96        | 0.03       | 1.07        | 0.04       | 1.20        | 0.06       |
| <i>PPA1</i>                 | 0.99        | 0.02       | 0.94        | 0.02       | 1.00        | 0.04       | 1.12        | 0.04       |
| <i>PRDX3</i>                | 0.94        | 0.02       | 0.97        | 0.04       | 0.98        | 0.04       | 1.09        | 0.03       |
| <i>PSMD1</i>                | 0.93        | 0.06       | 0.84        | 0.05       | 1.17        | 0.09       | 1.06        | 0.07       |
| <i>PSME1</i>                | 0.91        | 0.03       | 0.92        | 0.04       | 1.20        | 0.10       | 1.18        | 0.09       |
| <i>PTER</i>                 | 0.84        | 0.04       | 0.88        | 0.06       | 1.20        | 0.09       | 1.17        | 0.08       |
| <i>PYGB</i>                 | 1.08        | 0.04       | 1.06        | 0.04       | 1.01        | 0.06       | 0.80        | 0.05       |
| <i>RSU1</i>                 | 0.87        | 0.05       | 0.91        | 0.06       | 1.11        | 0.14       | 1.37        | 0.11       |
| <i>SCP2</i>                 | 1.05        | 0.03       | 1.06        | 0.03       | 0.89        | 0.06       | 0.80        | 0.08       |
| <i>SDS</i>                  | 0.93        | 0.05       | 0.87        | 0.03       | 1.02        | 0.06       | 1.44        | 0.11       |
| <i>SEPT7</i>                | 2.27        | 0.45       | 0.73        | 0.12       | 1.14        | 0.20       | 1.10        | 0.12       |
| <i>SERPINA1</i><br><i>A</i> | 1.25        | 0.11       | 1.06        | 0.06       | 0.93        | 0.08       | 0.76        | 0.06       |
| <i>SERPINA3</i><br><i>G</i> | 1.20        | 0.12       | 1.12        | 0.11       | 0.92        | 0.10       | 0.62        | 0.08       |
| <i>SERPINH</i><br><i>I</i>  | 0.76        | 0.07       | 1.03        | 0.10       | 1.19        | 0.10       | 1.09        | 0.07       |
| <i>SLC27A5</i>              | 0.92        | 0.02       | 0.96        | 0.02       | 1.00        | 0.04       | 1.13        | 0.05       |
| <i>SOD2</i>                 | 1.03        | 0.03       | 1.01        | 0.04       | 0.98        | 0.03       | 0.88        | 0.03       |
| <i>STEAP4</i>               | 0.78        | 0.07       | 0.93        | 0.08       | 1.54        | 0.17       | 1.23        | 0.19       |
| <i>SULT1A1</i>              | 0.70        | 0.03       | 0.97        | 0.03       | 1.14        | 0.07       | 1.46        | 0.09       |

|                |                 |            |                  |            |                  |            |                  |            |
|----------------|-----------------|------------|------------------|------------|------------------|------------|------------------|------------|
| <i>SULT1D1</i> | 0.88            | 0.04       | 1.04             | 0.04       | 0.93             | 0.06       | 1.12             | 0.05       |
| <i>SULT2A3</i> | 1.10            | 0.05       | 1.14             | 0.06       | 0.86             | 0.07       | 0.68             | 0.08       |
| <i>TAGLN2</i>  | 0.91            | 0.04       | 0.98             | 0.07       | 1.16             | 0.13       | 1.47             | 0.14       |
|                | <b>8 months</b> |            | <b>16 months</b> |            | <b>24 months</b> |            | <b>32 months</b> |            |
|                | <b>Mean</b>     | <b>SEM</b> | <b>Mean</b>      | <b>SEM</b> | <b>Mean</b>      | <b>SEM</b> | <b>Mean</b>      | <b>SEM</b> |
| <i>TGM7</i>    | 1.09            | 0.09       | 1.16             | 0.08       | 0.87             | 0.09       | 0.59             | 0.05       |
| <i>TMCO1</i>   | 1.08            | 0.04       | 0.82             | 0.03       | 1.01             | 0.06       | 1.05             | 0.05       |
| <i>TSTD1</i>   | 0.43            | 0.08       | 0.95             | 0.10       | 1.02             | 0.11       | 1.11             | 0.15       |
| <i>TWF1</i>    | 0.91            | 0.04       | 0.90             | 0.05       | 1.08             | 0.09       | 1.26             | 0.11       |
| <i>UGT1A10</i> | 0.62            | 0.09       | 1.10             | 0.09       | 1.10             | 0.17       | 0.92             | 0.06       |
| <i>URAD</i>    | 0.85            | 0.02       | 0.96             | 0.05       | 1.09             | 0.09       | 1.43             | 0.12       |
| <i>VDAC2</i>   | 0.95            | 0.02       | 0.96             | 0.02       | 1.05             | 0.04       | 1.10             | 0.02       |
| <i>XYLB</i>    | 0.92            | 0.02       | 0.96             | 0.02       | 1.06             | 0.03       | 1.05             | 0.02       |

**Supplementary Table 4. All significant proteins for the male f1a C57BL/6Jnia:Balb/cBy via one-way ANOVA analysis with a false discovery rate of 5%. Shown for each protein is the mean expression of that protein at a particular age relative to expression of that protein in C57BL/6Jnia male mice at 8 months of age.**

|                      | <b>8 months</b> |      | <b>16 months</b> |      | <b>24 months</b> |      | <b>32 months</b> |      | <b>36 months</b> |      |
|----------------------|-----------------|------|------------------|------|------------------|------|------------------|------|------------------|------|
|                      | Mean            | SEM  | Mean             | SEM  | Mean             | SEM  | Mean             | SEM  | Mean             | SEM  |
| <i>9030617O03RIK</i> | 1.01            | 0.06 | 1.32             | 0.09 | 1.41             | 0.09 | 1.56             | 0.05 | 1.17             | 0.20 |
| <i>AARS</i>          | 0.97            | 0.05 | 0.81             | 0.04 | 0.78             | 0.02 | 0.85             | 0.03 | 0.94             | 0.18 |
| <i>AASS</i>          | 1.02            | 0.04 | 1.03             | 0.03 | 1.09             | 0.02 | 1.26             | 0.02 | 1.05             | 0.18 |
| <i>ACLY</i>          | 0.99            | 0.08 | 0.94             | 0.05 | 0.90             | 0.05 | 0.74             | 0.03 | 1.15             | 0.22 |
| <i>ACSF2</i>         | 1.05            | 0.02 | 1.02             | 0.03 | 1.12             | 0.02 | 1.09             | 0.02 | 0.77             | 0.11 |
| <i>ACSMI</i>         | 1.05            | 0.05 | 1.04             | 0.03 | 1.07             | 0.02 | 1.24             | 0.01 | 0.85             | 0.13 |
| <i>ACTNI</i>         | 1.00            | 0.01 | 1.07             | 0.02 | 1.13             | 0.02 | 1.29             | 0.02 | 1.23             | 0.23 |
| <i>ALDH1A7</i>       | 1.02            | 0.04 | 1.01             | 0.02 | 1.02             | 0.03 | 1.05             | 0.03 | 0.69             | 0.12 |
| <i>ALDH3A2</i>       | 1.04            | 0.03 | 1.09             | 0.03 | 1.05             | 0.04 | 1.00             | 0.01 | 0.64             | 0.11 |
| <i>ALDH7A1</i>       | 1.04            | 0.03 | 1.04             | 0.02 | 1.15             | 0.03 | 1.11             | 0.02 | 0.83             | 0.13 |
| <i>ANXA6</i>         | 1.04            | 0.02 | 1.08             | 0.02 | 1.10             | 0.02 | 1.15             | 0.03 | 1.18             | 0.19 |
| <i>AP2MI</i>         | 1.01            | 0.07 | 1.11             | 0.04 | 0.87             | 0.06 | 1.20             | 0.03 | 1.31             | 0.24 |
| <i>ARG1</i>          | 0.98            | 0.03 | 1.02             | 0.03 | 1.02             | 0.04 | 1.05             | 0.01 | 1.07             | 0.20 |
| <i>AS3MT</i>         | 0.98            | 0.09 | 0.84             | 0.09 | 1.06             | 0.07 | 1.63             | 0.16 | 2.21             | 0.51 |
| <i>ASAHI</i>         | 0.97            | 0.09 | 0.87             | 0.08 | 1.21             | 0.09 | 1.56             | 0.05 | 1.15             | 0.23 |
| <i>ASL</i>           | 1.03            | 0.01 | 1.04             | 0.02 | 0.97             | 0.04 | 0.97             | 0.02 | 1.06             | 0.18 |
| <i>ATP1B1</i>        | 0.98            | 0.05 | 1.07             | 0.03 | 1.12             | 0.06 | 1.20             | 0.04 | 0.70             | 0.14 |
| <i>ATP2A2</i>        | 1.04            | 0.09 | 1.22             | 0.08 | 0.95             | 0.11 | 1.64             | 0.10 | 1.73             | 0.36 |
| <i>CA2</i>           | 0.98            | 0.04 | 1.23             | 0.07 | 1.35             | 0.10 | 0.96             | 0.03 | 0.81             | 0.15 |
| <i>CA3</i>           | 1.02            | 0.03 | 1.02             | 0.05 | 1.00             | 0.04 | 0.79             | 0.02 | 0.54             | 0.11 |
| <i>CBS</i>           | 1.01            | 0.05 | 1.08             | 0.04 | 1.03             | 0.03 | 1.25             | 0.04 | 1.17             | 0.20 |
| <i>CCDC66</i>        | 0.99            | 0.09 | 1.53             | 0.17 | 1.64             | 0.11 | 0.84             | 0.07 | 0.78             | 0.15 |
| <i>CYP2A12</i>       | 1.03            | 0.14 | 0.82             | 0.06 | 0.73             | 0.06 | 1.56             | 0.03 | 1.38             | 0.33 |

|                  |          |      |           |      |           |      |           |      |           |      |
|------------------|----------|------|-----------|------|-----------|------|-----------|------|-----------|------|
| <i>CYP2C29</i>   | 0.99     | 0.07 | 1.18      | 0.10 | 0.99      | 0.12 | 1.07      | 0.09 | 0.31      | 0.08 |
| <i>CYP2C40</i>   | 0.97     | 0.04 | 1.02      | 0.03 | 0.97      | 0.07 | 1.16      | 0.05 | 0.49      | 0.10 |
| <i>CYP2C44</i>   | 0.99     | 0.05 | 1.07      | 0.07 | 1.15      | 0.06 | 1.57      | 0.06 | 1.17      | 0.23 |
| <i>CYP2C69</i>   | 0.96     | 0.06 | 1.05      | 0.04 | 0.99      | 0.05 | 1.10      | 0.03 | 0.55      | 0.12 |
| <i>CYP3A11</i>   | 0.97     | 0.05 | 0.78      | 0.02 | 0.78      | 0.06 | 0.83      | 0.04 | 0.42      | 0.09 |
| <i>CYP4A12B</i>  | 1.03     | 0.03 | 0.99      | 0.05 | 1.12      | 0.04 | 1.08      | 0.01 | 0.72      | 0.12 |
| <i>CYP7B1</i>    | 1.02     | 0.13 | 1.09      | 0.07 | 1.81      | 0.18 | 1.72      | 0.09 | 0.71      | 0.19 |
| <i>DDX1</i>      | 0.95     | 0.08 | 1.13      | 0.10 | 1.14      | 0.11 | 1.22      | 0.06 | 1.89      | 0.36 |
| <i>DECR1</i>     | 0.98     | 0.03 | 0.98      | 0.03 | 0.96      | 0.05 | 0.92      | 0.01 | 0.58      | 0.11 |
| <i>DPYD</i>      | 0.96     | 0.06 | 1.11      | 0.05 | 1.14      | 0.06 | 1.25      | 0.05 | 1.18      | 0.22 |
| <i>ECHS1</i>     | 1.01     | 0.03 | 1.02      | 0.02 | 1.07      | 0.02 | 1.17      | 0.02 | 0.93      | 0.15 |
| <i>ELOVL5</i>    | 0.97     | 0.13 | 0.96      | 0.05 | 0.92      | 0.06 | 0.74      | 0.03 | 1.23      | 0.35 |
| <i>EPHX2</i>     | 1.04     | 0.03 | 0.97      | 0.03 | 0.91      | 0.03 | 0.80      | 0.03 | 0.73      | 0.12 |
| <i>FTH1</i>      | 1.03     | 0.04 | 0.82      | 0.09 | 0.69      | 0.10 | 1.32      | 0.13 | 2.66      | 0.59 |
| <i>FTL1</i>      | 0.98     | 0.07 | 0.99      | 0.07 | 1.08      | 0.08 | 1.52      | 0.11 | 2.47      | 0.56 |
|                  | 8 months |      | 16 months |      | 24 months |      | 32 months |      | 36 months |      |
|                  | Mean     | SEM  | Mean      | SEM  | Mean      | SEM  | Mean      | SEM  | Mean      | SEM  |
| <i>GADL1</i>     | 0.98     | 0.10 | 0.78      | 0.09 | 0.88      | 0.06 | 0.96      | 0.07 | 1.65      | 0.29 |
| <i>GCDH</i>      | 1.05     | 0.02 | 1.07      | 0.03 | 1.03      | 0.02 | 0.99      | 0.01 | 0.74      | 0.11 |
| <i>GCK</i>       | 1.02     | 0.04 | 0.88      | 0.04 | 0.96      | 0.04 | 0.91      | 0.04 | 1.13      | 0.22 |
| <i>GGCX</i>      | 1.02     | 0.10 | 1.03      | 0.05 | 1.10      | 0.05 | 1.35      | 0.04 | 1.74      | 0.32 |
| <i>GOT1</i>      | 0.97     | 0.05 | 1.11      | 0.08 | 1.01      | 0.06 | 1.10      | 0.06 | 1.24      | 0.22 |
| <i>GULO</i>      | 1.01     | 0.01 | 0.95      | 0.03 | 0.86      | 0.03 | 0.97      | 0.03 | 0.65      | 0.11 |
| <i>HAL</i>       | 0.98     | 0.04 | 0.93      | 0.02 | 0.88      | 0.03 | 0.85      | 0.03 | 0.94      | 0.17 |
| <i>HBA</i>       | 1.04     | 0.08 | 1.33      | 0.13 | 1.43      | 0.11 | 0.93      | 0.03 | 0.76      | 0.13 |
| <i>HBBT1</i>     | 1.04     | 0.06 | 1.47      | 0.15 | 1.58      | 0.12 | 0.96      | 0.04 | 0.78      | 0.13 |
| <i>HNRNPA2B1</i> | 1.05     | 0.03 | 1.06      | 0.03 | 1.11      | 0.01 | 1.19      | 0.03 | 1.17      | 0.20 |
| <i>HNRNPA3</i>   | 0.97     | 0.01 | 0.96      | 0.02 | 1.03      | 0.04 | 1.11      | 0.03 | 1.06      | 0.20 |
| <i>HSD17B13</i>  | 1.03     | 0.04 | 1.03      | 0.05 | 1.10      | 0.07 | 1.06      | 0.04 | 1.45      | 0.30 |
| <i>KEG1</i>      | 0.99     | 0.02 | 0.92      | 0.03 | 1.07      | 0.03 | 0.98      | 0.02 | 0.69      | 0.12 |
| <i>KRT10</i>     | 0.98     | 0.04 | 1.09      | 0.03 | 1.15      | 0.03 | 1.45      | 0.05 | 1.42      | 0.29 |
| <i>KRT8</i>      | 1.04     | 0.03 | 1.10      | 0.03 | 1.25      | 0.04 | 1.41      | 0.05 | 1.36      | 0.24 |
| <i>LDHA</i>      | 1.00     | 0.03 | 0.97      | 0.03 | 0.90      | 0.02 | 1.00      | 0.02 | 1.08      | 0.20 |
| <i>LGALS3BP</i>  | 0.96     | 0.10 | 0.95      | 0.08 | 0.89      | 0.06 | 1.75      | 0.03 | 0.84      | 0.26 |
| <i>LPCAT3</i>    | 1.02     | 0.05 | 1.13      | 0.04 | 1.14      | 0.05 | 1.15      | 0.01 | 1.18      | 0.23 |
| <i>MARC2</i>     | 0.96     | 0.04 | 1.00      | 0.04 | 1.01      | 0.04 | 1.09      | 0.03 | 0.62      | 0.12 |
| <i>MATR3</i>     | 1.04     | 0.05 | 1.00      | 0.07 | 1.05      | 0.07 | 1.25      | 0.04 | 1.49      | 0.29 |
| <i>MEI</i>       | 1.02     | 0.11 | 0.99      | 0.08 | 0.87      | 0.08 | 0.45      | 0.03 | 0.86      | 0.17 |
| <i>MUP10</i>     | 1.00     | 0.07 | 1.02      | 0.07 | 0.97      | 0.05 | 0.79      | 0.03 | 0.42      | 0.09 |
| <i>MYO18A</i>    | 0.99     | 0.15 | 1.11      | 0.08 | 1.05      | 0.08 | 1.80      | 0.08 | 2.23      | 0.57 |
| <i>NAMPT</i>     | 1.00     | 0.07 | 0.79      | 0.04 | 1.24      | 0.05 | 1.37      | 0.05 | 1.65      | 0.40 |
| <i>NAPRT1</i>    | 1.02     | 0.05 | 1.07      | 0.02 | 1.00      | 0.04 | 1.09      | 0.02 | 1.10      | 0.18 |
| <i>PAICS</i>     | 0.97     | 0.10 | 0.98      | 0.05 | 1.17      | 0.07 | 1.40      | 0.05 | 1.36      | 0.25 |
| <i>PAQR9</i>     | 1.02     | 0.08 | 1.03      | 0.08 | 1.01      | 0.12 | 1.25      | 0.09 | 1.42      | 0.30 |

|                  |          |      |           |      |           |      |           |      |           |      |
|------------------|----------|------|-----------|------|-----------|------|-----------|------|-----------|------|
| <i>PCYT2</i>     | 1.05     | 0.05 | 1.05      | 0.08 | 1.07      | 0.04 | 1.00      | 0.02 | 1.25      | 0.20 |
| <i>PECR</i>      | 1.02     | 0.02 | 1.06      | 0.03 | 1.02      | 0.02 | 0.99      | 0.01 | 0.71      | 0.12 |
| <i>PGLS</i>      | 1.02     | 0.04 | 1.04      | 0.03 | 1.03      | 0.05 | 0.94      | 0.04 | 1.12      | 0.19 |
| <i>PLS3</i>      | 0.99     | 0.03 | 1.04      | 0.02 | 1.12      | 0.04 | 1.26      | 0.07 | 1.22      | 0.23 |
| <i>PONI</i>      | 0.96     | 0.05 | 0.97      | 0.04 | 0.95      | 0.03 | 1.21      | 0.04 | 0.54      | 0.11 |
| <i>PRDX4</i>     | 1.01     | 0.02 | 0.99      | 0.02 | 1.02      | 0.02 | 1.10      | 0.03 | 0.99      | 0.16 |
| <i>QPRT</i>      | 0.98     | 0.03 | 0.92      | 0.02 | 0.90      | 0.03 | 0.96      | 0.02 | 1.06      | 0.19 |
| <i>RABIA</i>     | 0.97     | 0.04 | 1.00      | 0.04 | 0.87      | 0.05 | 1.17      | 0.04 | 1.08      | 0.20 |
| <i>RPL35A</i>    | 1.01     | 0.07 | 1.04      | 0.06 | 1.01      | 0.06 | 1.16      | 0.07 | 1.37      | 0.27 |
| <i>RPS26</i>     | 0.96     | 0.04 | 0.83      | 0.02 | 0.83      | 0.02 | 0.87      | 0.04 | 1.01      | 0.20 |
| <i>RPS4X</i>     | 0.97     | 0.04 | 0.94      | 0.02 | 0.90      | 0.01 | 1.03      | 0.02 | 1.01      | 0.19 |
| <i>SARDH</i>     | 0.98     | 0.03 | 0.99      | 0.02 | 1.00      | 0.03 | 0.96      | 0.02 | 0.59      | 0.11 |
| <i>SCARA3</i>    | 0.99     | 0.05 | 1.11      | 0.06 | 1.08      | 0.08 | 0.94      | 0.07 | 0.53      | 0.10 |
| <i>SCDI</i>      | 1.00     | 0.16 | 0.98      | 0.17 | 0.88      | 0.09 | 0.54      | 0.06 | 2.28      | 0.70 |
| <i>SDS</i>       | 0.98     | 0.04 | 1.14      | 0.05 | 1.06      | 0.04 | 1.18      | 0.05 | 1.61      | 0.30 |
|                  | 8 months |      | 16 months |      | 24 months |      | 32 months |      | 36 months |      |
|                  | Mean     | SEM  | Mean      | SEM  | Mean      | SEM  | Mean      | SEM  | Mean      | SEM  |
| <i>SEC14L4</i>   | 1.03     | 0.04 | 1.10      | 0.02 | 1.11      | 0.02 | 0.98      | 0.02 | 1.15      | 0.19 |
| <i>SELENBP2</i>  | 1.04     | 0.10 | 1.04      | 0.09 | 1.37      | 0.08 | 1.57      | 0.02 | 1.16      | 0.20 |
| <i>SERPINA3G</i> | 0.97     | 0.07 | 1.15      | 0.10 | 1.35      | 0.12 | 0.79      | 0.04 | 0.70      | 0.13 |
| <i>SLC4A1</i>    | 1.00     | 0.04 | 1.41      | 0.17 | 1.63      | 0.14 | 0.91      | 0.05 | 0.76      | 0.13 |
| <i>SORD</i>      | 0.99     | 0.02 | 0.97      | 0.02 | 0.90      | 0.03 | 0.93      | 0.02 | 0.69      | 0.12 |
| <i>SPR</i>       | 1.00     | 0.05 | 0.99      | 0.03 | 1.03      | 0.03 | 1.11      | 0.03 | 1.06      | 0.18 |
| <i>SULT2A3</i>   | 1.02     | 0.04 | 1.08      | 0.05 | 0.98      | 0.04 | 0.96      | 0.03 | 0.63      | 0.11 |
| <i>TKT</i>       | 0.99     | 0.02 | 1.00      | 0.03 | 1.03      | 0.01 | 1.00      | 0.02 | 1.05      | 0.18 |
| <i>TMEM205</i>   | 1.01     | 0.04 | 1.00      | 0.03 | 1.09      | 0.05 | 1.11      | 0.04 | 0.72      | 0.12 |
| <i>TPI1</i>      | 1.01     | 0.02 | 0.97      | 0.02 | 1.00      | 0.02 | 1.07      | 0.01 | 1.07      | 0.18 |
| <i>UGT1A5</i>    | 0.98     | 0.02 | 0.98      | 0.01 | 1.01      | 0.03 | 1.03      | 0.01 | 0.76      | 0.13 |
| <i>UGT3A2</i>    | 0.97     | 0.03 | 0.93      | 0.02 | 0.93      | 0.03 | 0.98      | 0.04 | 0.58      | 0.11 |

**Supplementary Table 5. All significant proteins for the female f1b C57BL/6J:FVB/NJ via one-way ANOVA analysis with a false discovery rate of 5%. Shown for each protein is the mean expression of that protein at a particular age relative to expression of that protein in C57BL/6Jnia male mice at 8 months of age.**

|                  | 8 months |      | 14 months |      | 24 months |      | 30 months |      |
|------------------|----------|------|-----------|------|-----------|------|-----------|------|
|                  | Mean     | SEM  | Mean      | SEM  | Mean      | SEM  | Mean      | SEM  |
| <i>ABCC6</i>     | 1.09     | 0.05 | 1.18      | 0.07 | 0.89      | 0.07 | 0.73      | 0.03 |
| <i>ACAA1B</i>    | 0.78     | 0.05 | 1.29      | 0.11 | 1.53      | 0.09 | 0.70      | 0.11 |
| <i>ACAT1</i>     | 0.97     | 0.05 | 1.19      | 0.07 | 1.08      | 0.04 | 0.59      | 0.11 |
| <i>ACOX1</i>     | 0.88     | 0.04 | 1.19      | 0.05 | 1.12      | 0.05 | 0.79      | 0.08 |
| <i>ACOX2</i>     | 0.86     | 0.05 | 1.03      | 0.05 | 1.07      | 0.08 | 1.94      | 0.33 |
| <i>ACTN1</i>     | 0.99     | 0.03 | 1.03      | 0.06 | 0.93      | 0.04 | 1.53      | 0.14 |
| <i>ADCK3</i>     | 1.02     | 0.06 | 1.18      | 0.08 | 0.92      | 0.06 | 0.40      | 0.06 |
| <i>ADH4</i>      | 0.97     | 0.06 | 1.10      | 0.12 | 0.93      | 0.08 | 1.69      | 0.15 |
| <i>AGXT2</i>     | 0.95     | 0.03 | 1.08      | 0.05 | 1.02      | 0.02 | 0.79      | 0.03 |
| <i>AHNAK</i>     | 0.96     | 0.07 | 1.05      | 0.09 | 0.85      | 0.07 | 1.54      | 0.08 |
| <i>AK2</i>       | 1.04     | 0.05 | 1.14      | 0.06 | 0.97      | 0.03 | 0.68      | 0.09 |
| <i>ALDH9A1</i>   | 1.00     | 0.03 | 1.13      | 0.07 | 1.07      | 0.02 | 0.64      | 0.02 |
| <i>ANXA11</i>    | 1.61     | 0.37 | 0.91      | 0.30 | 0.80      | 0.33 | 6.22      | 0.23 |
| <i>APOB</i>      | 1.00     | 0.06 | 0.96      | 0.08 | 1.01      | 0.07 | 1.63      | 0.05 |
| <i>APRT</i>      | 1.05     | 0.05 | 1.09      | 0.14 | 0.95      | 0.02 | 3.60      | 0.16 |
| <i>ARCNI</i>     | 1.00     | 0.07 | 1.02      | 0.06 | 0.93      | 0.07 | 1.82      | 0.08 |
| <i>AS3MT</i>     | 0.96     | 0.13 | 0.94      | 0.14 | 1.09      | 0.12 | 2.36      | 0.26 |
| <i>BDHI</i>      | 0.88     | 0.04 | 1.12      | 0.03 | 1.08      | 0.03 | 0.60      | 0.14 |
| <i>BPHL</i>      | 0.95     | 0.04 | 1.11      | 0.05 | 1.08      | 0.05 | 0.73      | 0.06 |
| <i>CA3</i>       | 1.02     | 0.04 | 1.15      | 0.06 | 1.03      | 0.03 | 0.60      | 0.05 |
| <i>CES2G</i>     | 0.97     | 0.02 | 1.20      | 0.07 | 0.97      | 0.04 | 0.64      | 0.15 |
| <i>CP</i>        | 0.93     | 0.07 | 0.88      | 0.09 | 0.99      | 0.08 | 4.31      | 0.97 |
| <i>CRYZ</i>      | 0.90     | 0.02 | 1.11      | 0.05 | 1.17      | 0.05 | 0.87      | 0.05 |
| <i>DDX39A</i>    | 0.97     | 0.01 | 1.06      | 0.06 | 0.94      | 0.05 | 1.68      | 0.23 |
| <i>FBP1</i>      | 0.96     | 0.03 | 1.10      | 0.06 | 1.11      | 0.03 | 0.74      | 0.09 |
| <i>FDX1</i>      | 1.42     | 0.08 | 0.91      | 0.06 | 0.93      | 0.04 | 0.76      | 0.03 |
| <i>FGGY</i>      | 0.80     | 0.08 | 1.19      | 0.14 | 0.95      | 0.10 | 1.65      | 0.13 |
| <i>FMO1</i>      | 1.22     | 0.06 | 1.08      | 0.07 | 0.82      | 0.04 | 0.55      | 0.09 |
| <i>GALK1</i>     | 0.87     | 0.08 | 0.94      | 0.06 | 1.12      | 0.05 | 1.45      | 0.05 |
| <i>GC</i>        | 0.92     | 0.07 | 1.02      | 0.09 | 1.04      | 0.04 | 1.59      | 0.15 |
| <i>GCLC</i>      | 0.94     | 0.03 | 1.19      | 0.07 | 1.10      | 0.07 | 0.65      | 0.09 |
| <i>GNB2</i>      | 0.97     | 0.06 | 0.98      | 0.05 | 0.95      | 0.01 | 1.41      | 0.08 |
| <i>GSS</i>       | 1.06     | 0.04 | 0.99      | 0.07 | 0.91      | 0.06 | 1.84      | 0.27 |
| <i>GSTZI</i>     | 0.98     | 0.04 | 1.11      | 0.06 | 1.06      | 0.03 | 0.78      | 0.02 |
| <i>HDHD2</i>     | 1.01     | 0.04 | 1.17      | 0.08 | 1.03      | 0.04 | 0.65      | 0.08 |
| <i>HNRNPA2B1</i> | 0.93     | 0.04 | 0.99      | 0.05 | 1.03      | 0.05 | 1.31      | 0.02 |
| <i>HNRNPAB</i>   | 1.00     | 0.04 | 1.01      | 0.07 | 1.05      | 0.05 | 1.72      | 0.19 |
| <i>HNRNPD</i>    | 0.93     | 0.03 | 0.99      | 0.04 | 0.95      | 0.06 | 1.96      | 0.30 |
|                  | 8 months |      | 14 months |      | 24 months |      | 30 months |      |



|                 | Mean | SEM  | Mean | SEM  | Mean | SEM  | Mean | SEM  |
|-----------------|------|------|------|------|------|------|------|------|
| <i>HNRNPK</i>   | 0.99 | 0.02 | 0.99 | 0.04 | 0.98 | 0.02 | 1.39 | 0.14 |
| <i>IQGAP2</i>   | 0.90 | 0.05 | 1.09 | 0.09 | 0.96 | 0.04 | 1.49 | 0.09 |
| <i>MAOB</i>     | 1.08 | 0.03 | 1.07 | 0.08 | 0.98 | 0.04 | 0.68 | 0.06 |
| <i>MTHFD1</i>   | 0.98 | 0.03 | 1.14 | 0.05 | 1.03 | 0.03 | 0.73 | 0.05 |
| <i>MYO1C</i>    | 0.91 | 0.05 | 1.04 | 0.07 | 1.01 | 0.07 | 1.70 | 0.24 |
| <i>NCL</i>      | 0.98 | 0.04 | 0.97 | 0.05 | 0.95 | 0.09 | 2.05 | 0.34 |
| <i>NQO2</i>     | 0.91 | 0.07 | 1.09 | 0.10 | 1.34 | 0.08 | 0.50 | 0.16 |
| <i>NUDT7</i>    | 1.38 | 0.08 | 1.07 | 0.11 | 0.90 | 0.03 | 0.44 | 0.04 |
| <i>PDCD6</i>    | 0.98 | 0.08 | 0.90 | 0.11 | 0.87 | 0.05 | 1.48 | 0.06 |
| <i>PKLR</i>     | 0.86 | 0.05 | 1.12 | 0.09 | 1.59 | 0.18 | 0.55 | 0.15 |
| <i>PLEC</i>     | 1.07 | 0.07 | 0.89 | 0.05 | 0.83 | 0.04 | 4.06 | 0.54 |
| <i>PPP6C</i>    | 1.03 | 0.05 | 0.89 | 0.10 | 0.98 | 0.05 | 1.45 | 0.06 |
| <i>PRPS1L3</i>  | 0.84 | 0.07 | 1.25 | 0.08 | 1.15 | 0.03 | 0.64 | 0.10 |
| <i>PSMC2</i>    | 0.97 | 0.06 | 1.06 | 0.09 | 0.99 | 0.06 | 1.95 | 0.27 |
| <i>PSMC6</i>    | 0.94 | 0.03 | 1.11 | 0.04 | 0.99 | 0.08 | 1.47 | 0.09 |
| <i>RGN</i>      | 1.04 | 0.04 | 1.13 | 0.05 | 0.99 | 0.04 | 0.69 | 0.09 |
| <i>RPL12</i>    | 1.00 | 0.03 | 0.99 | 0.09 | 0.98 | 0.03 | 1.47 | 0.10 |
| <i>RPL24</i>    | 0.93 | 0.06 | 1.05 | 0.10 | 0.95 | 0.03 | 1.66 | 0.21 |
| <i>RPL27A</i>   | 0.85 | 0.04 | 0.98 | 0.04 | 0.92 | 0.05 | 1.31 | 0.03 |
| <i>RPS10</i>    | 0.99 | 0.03 | 1.06 | 0.09 | 0.99 | 0.03 | 1.49 | 0.12 |
| <i>RPS6</i>     | 1.00 | 0.04 | 1.01 | 0.06 | 0.92 | 0.05 | 1.62 | 0.23 |
| <i>RPS8</i>     | 1.02 | 0.01 | 1.04 | 0.08 | 0.95 | 0.02 | 1.51 | 0.15 |
| <i>SARDH</i>    | 1.08 | 0.05 | 1.09 | 0.06 | 0.98 | 0.06 | 0.65 | 0.07 |
| <i>SEC14L2</i>  | 0.99 | 0.03 | 1.13 | 0.03 | 0.99 | 0.04 | 0.55 | 0.09 |
| <i>SEC63</i>    | 0.88 | 0.04 | 1.01 | 0.10 | 0.97 | 0.06 | 1.98 | 0.35 |
| <i>SLC22A18</i> | 0.84 | 0.05 | 1.19 | 0.13 | 0.96 | 0.07 | 1.71 | 0.15 |
| <i>SND1</i>     | 1.00 | 0.03 | 1.03 | 0.09 | 0.96 | 0.02 | 1.49 | 0.15 |
| <i>SNX2</i>     | 0.83 | 0.04 | 1.13 | 0.04 | 1.13 | 0.06 | 0.76 | 0.09 |
| <i>SOD1</i>     | 0.96 | 0.06 | 1.20 | 0.09 | 1.18 | 0.09 | 0.58 | 0.09 |
| <i>SORD</i>     | 1.02 | 0.02 | 1.11 | 0.04 | 0.99 | 0.03 | 0.73 | 0.09 |
| <i>STARD5</i>   | 1.06 | 0.10 | 0.98 | 0.11 | 0.94 | 0.06 | 1.77 | 0.15 |
| <i>TPPI1</i>    | 0.99 | 0.05 | 0.96 | 0.09 | 0.92 | 0.06 | 2.11 | 0.43 |
| <i>TTC36</i>    | 1.09 | 0.04 | 1.05 | 0.03 | 0.90 | 0.07 | 0.65 | 0.10 |
| <i>TWF1</i>     | 1.01 | 0.04 | 1.03 | 0.09 | 0.93 | 0.03 | 2.06 | 0.41 |
| <i>TXNDC5</i>   | 0.99 | 0.06 | 1.01 | 0.04 | 0.94 | 0.08 | 1.78 | 0.12 |
| <i>VTN</i>      | 0.98 | 0.04 | 1.08 | 0.17 | 0.93 | 0.10 | 2.32 | 0.38 |

**Supplementary Table 6. Pathways identified as altered most significantly with chronological age.** Tables show log<sub>2</sub> fold difference in protein expression of all proteins significantly altered with chronological age found in pathways identified as being altered with aging in three wild-type strains of mice. The numbers indicate the ratio of old vs. young for male **inbred** C57BL/6Jnia (M1), male **f1a** C57BL6/Jnia:Balb/cBy (M2), and female **f1b** C57BL/6J:FVB/NJ (F) mice. Gold is used to highlight proteins where protein expression was greater in old mice than young. Blue is used to indicate proteins where expression was decreased in old mice compared to young. The darker the shade, the more expression differed between young and old mice. Bold is used to indicate when *p* is <0.05; bold and italics *p*<0.01; bold, italics and underline *p*<0.001 by one-way ANOVA.

#### H2O2 Antioxidant Response

|      | M1           | M2          | F            |
|------|--------------|-------------|--------------|
| CAT  | -0.15        | -0.04       | <b>-0.32</b> |
| FTH1 | <b>0.99</b>  | <b>1.61</b> | <b>1.19</b>  |
| FTL1 | <b>1.19</b>  | <b>1.54</b> | <b>0.93</b>  |
| GPX1 | -0.19        | -0.12       | <b>-0.57</b> |
| SOD1 | -0.23        | 0.08        | <b>-0.74</b> |
| SOD2 | <b>-0.23</b> | -0.10       | 0.04         |

#### Oxidative Protein Damage Response

|        | M1          | M2          | F            |
|--------|-------------|-------------|--------------|
| CBR1   | <b>0.50</b> | <b>0.54</b> | 0.27         |
| PRDX3  | <b>0.22</b> | 0.20        | 0.17         |
| TXN2   | 0.18        | 0.00        | <b>-0.61</b> |
| TXNRD2 | 0.24        | 0.29        | <b>0.33</b>  |

#### Fatty acid Oxidation

|        | M1           | M2           | F            |
|--------|--------------|--------------|--------------|
| ABCD3  | -0.27        | 0.04         | -0.12        |
| ACAA1B | <b>-0.57</b> | -0.20        | -0.15        |
| ACADL  | -0.03        | -0.02        | 0.05         |
| ACADS  | -0.17        | <b>-0.17</b> | 0.00         |
| ACADSB | <b>-0.46</b> | <b>0.57</b>  | <b>-0.82</b> |
| ACAT1  | <b>-0.28</b> | -0.13        | <b>-0.70</b> |
| ACOX1  | <b>-0.33</b> | -0.10        | -0.16        |
| ACSL1  | <b>-0.43</b> | -0.21        | <b>-0.42</b> |
| CPT2   | -0.16        | -0.10        | 0.05         |
| ECH1   | <b>-0.32</b> | 0.32         | -0.05        |
| ECHS1  | 0.10         | 0.11         | 0.03         |
| EHHADH | -0.07        | -0.02        | -0.15        |
| GCDH   | <b>-0.20</b> | <b>-0.31</b> | <b>-0.30</b> |
| HADHA  | -0.13        | -0.08        | -0.13        |
| HADHB  | -0.16        | -0.04        | -0.09        |

#### Glutathione Production

|       | M1           | M2           | F            |
|-------|--------------|--------------|--------------|
| AHCY  | -0.05        | <b>-0.12</b> | 0.14         |
| CBS   | <b>0.46</b>  | <b>0.43</b>  | <b>0.53</b>  |
| CTH   | <b>0.59</b>  | 0.03         | -0.01        |
| GCLC  | <b>-0.29</b> | -0.10        | <b>-0.52</b> |
| GSR   | 0.39         | 0.37         | <b>0.50</b>  |
| GSS   | <b>0.42</b>  | <b>0.74</b>  | <b>0.80</b>  |
| GSTM1 | <b>0.39</b>  | 0.32         | 0.43         |
| H6PD  | 0.20         | 0.22         | <b>1.16</b>  |
| MAT1A | <b>1.03</b>  | <b>0.70</b>  | <b>0.95</b>  |
| PGD   | 0.21         | 0.57         | 0.29         |

#### FXR-RXR

|           | M1           | M2           | F            |
|-----------|--------------|--------------|--------------|
| FASN      | 0.10         | 0.41         | <b>-1.38</b> |
| PKLR      | <b>-0.41</b> | 0.03         | <b>-0.63</b> |
| SERPINA1A | <b>-0.71</b> | <b>-0.42</b> | 0.09         |
| SULT2A3   | <b>-0.70</b> | <b>-0.49</b> | 0.29         |

#### CAR-RxR

|         | M1           | M2           | F            |
|---------|--------------|--------------|--------------|
| ALDH3A2 | -0.17        | <b>-0.53</b> | -0.05        |
| ALDH4A1 | 0.06         | -0.11        | <b>-0.38</b> |
| ALDH5A1 | <b>-0.39</b> | <b>-0.34</b> | -0.06        |
| ALDH9A1 | -0.10        | -0.11        | <b>-0.64</b> |
| CYP3A11 | <b>-0.42</b> | <b>-0.92</b> | 0.20         |
| FMO1    | 0.00         | <b>-0.37</b> | <b>-1.16</b> |

#### PXR-RXR

|         | M1           | M2          | F            |
|---------|--------------|-------------|--------------|
| CYP1A2  | <b>-0.40</b> | -0.29       | -0.17        |
| MAOB    | 0.14         | -0.01       | <b>-0.66</b> |
| SULT1A1 | <b>1.06</b>  | <b>0.58</b> | <b>0.36</b>  |

#### NFKB

|      | M1           | M2          | F           |
|------|--------------|-------------|-------------|
| C3   | <b>0.33</b>  | 0.77        | <b>0.82</b> |
| FN1  | <b>0.39</b>  | 0.35        | <b>0.78</b> |
| FTH1 | <b>0.99</b>  | <b>1.61</b> | <b>1.19</b> |
| SOD2 | <b>-0.23</b> | -0.10       | 0.04        |

#### CEBP

|           | M1           | M2           | F           |
|-----------|--------------|--------------|-------------|
| APCS      | 0.38         |              | <b>3.04</b> |
| CP        | 0.33         | 1.25         | <b>2.21</b> |
| FTL1      | <b>1.19</b>  | <b>1.54</b>  | <b>0.93</b> |
| HP        | <b>0.63</b>  | 0.11         |             |
| HPX       | 0.54         | 0.78         |             |
| SERPINA1A | <b>-0.71</b> | <b>-0.42</b> | 0.09        |

#### STAT3

|       | M1    | M2    | F           |
|-------|-------|-------|-------------|
| FGA   | -0.32 | 0.32  | <b>1.62</b> |
| FGB   | -0.33 | 0.26  | <b>0.81</b> |
| FGG   | -0.27 | 0.37  | 0.03        |
| HMOX1 | -0.29 | -0.20 | <b>1.06</b> |

#### FcyR Mediated Phagocytosis

|       | M1          | M2          | F           |
|-------|-------------|-------------|-------------|
| CDC42 | 0.37        | 0.21        | 0.48        |
| MYO1B | 0.09        | 0.23        | <b>0.68</b> |
| MYO1C | 0.52        | 0.66        | <b>0.90</b> |
| TLN1  | <b>0.31</b> | <b>0.46</b> | <b>0.74</b> |
| VAPB  | 0.12        | 0.08        | <b>0.43</b> |

#### PPAR-RXR

|        | M1           | M2           | F            |
|--------|--------------|--------------|--------------|
| ACOX1  | <b>-0.33</b> | -0.10        | -0.16        |
| FABP1  | <b>-1.03</b> | <b>-0.34</b> | <b>-0.99</b> |
| PEX11A | <b>-0.67</b> | 0.54         | -0.49        |

#### Clathrin Mediated Endocytosis

|        | M1          | M2          | F           |
|--------|-------------|-------------|-------------|
| ACTB   | <b>0.53</b> | <b>0.58</b> | <b>0.89</b> |
| ACTN1  | <b>0.40</b> | <b>0.51</b> | <b>0.63</b> |
| ACTN4  | <b>0.53</b> | <b>0.44</b> |             |
| ACTR2  | <b>0.40</b> | 0.32        | <b>0.53</b> |
| ACTR3  | <b>0.39</b> | 0.62        | <b>0.98</b> |
| AP2a2  | <b>0.25</b> | <b>0.38</b> | 0.28        |
| AP2B1  | 0.41        | 0.18        | <b>0.67</b> |
| AP2m1  | 0.15        | <b>0.60</b> | <b>0.44</b> |
| ARF6   | 0.20        | 0.21        | <b>0.42</b> |
| ARPC1A | 0.16        | 0.46        | <b>1.43</b> |
| ARPC1B | 0.43        | <b>1.09</b> |             |
| ARPC2  | 0.38        | <b>0.48</b> | <b>0.71</b> |
| ARPC3  | 0.00        | 0.15        | <b>0.52</b> |
| ARPC4  | 0.27        | 0.67        | <b>0.86</b> |
| ARPC5  | 0.41        | <b>0.46</b> |             |
| CLTA   | 0.27        | -0.01       | <b>0.79</b> |
| CLTB   | <b>0.38</b> | <b>0.75</b> | <b>0.44</b> |
| CLTC   | <b>0.36</b> | <b>0.39</b> | <b>0.65</b> |
| CTTN   | <b>0.48</b> | <b>0.55</b> |             |
| DNM3   | 0.27        | 0.51        | <b>0.67</b> |
| ITGB1  | <b>0.40</b> | <b>0.32</b> | 0.04        |
| PICALM | 0.04        | 0.33        | <b>0.50</b> |
| RAB11A | 0.36        | 0.28        | <b>0.57</b> |
| RAB5C  | 0.31        | 0.24        | <b>0.59</b> |
| RAB7A  | 0.12        | 0.13        | 0.08        |
| TF     | 0.42        | 0.47        | <b>1.10</b> |

#### PPAR

|         | M1          | M2          | F           |
|---------|-------------|-------------|-------------|
| CYP2C44 | <b>0.47</b> | <b>0.46</b> | 0.32        |
| CYP2C70 | <b>0.73</b> | <b>0.59</b> | <b>0.30</b> |

**Supplementary Table 7. VO<sub>2</sub> (ml/gm lean muscle) at rest or while active.** Shown is the mean for 16-22 mice per strain and age.

| Strain                     |         | 4 months | 12 months | 20 months | 28 months |
|----------------------------|---------|----------|-----------|-----------|-----------|
| C57BL/6Jnia (inbred)       | resting | 4301     | 4363      | 4290      | 3943      |
| C57BL/6Jnia:Balb/cBy (f1a) | resting | 4120     | 4058      | 4033      | 4188      |
| C57BL/6Jnia (inbred)       | active  | 4737     | 4845      | 4672      | 4380      |
| C57BL/6Jnia:Balb/cBy (f1a) | active  | 4637     | 4496      | 4362      | 4465      |

**Supplementary Table 8. Total composite lesion score (CLS) for inbred C57BL/6Jnia male mice and f1a hybrid C57BL/6Jnia:Balb/cBy mice at four ages.** The total CLS represents the sum of the average histopathologic score from 4 organs (heart, lung, kidney, liver) of n=8 mice per strain and age group. Shown is the mean ± standard deviation, unpaired two-tailed Student's t test.

| Strain               | 8 months  | 16 months | 24 months  | 32 months  |
|----------------------|-----------|-----------|------------|------------|
| C57BL/6Jnia          | 5.3 ± 1.3 | 4.8 ± 1.7 | 15.7 ± 2.1 | 20.8 ± 1.0 |
| C57BL/6Jnia:Balb/cBy | 4.0 ± 1.0 | 5.9 ± 1.4 | 11.5 ± 1.0 | 17.8 ± 2.4 |
| <i>p</i> value       | 0.14      | 0.40      | 0.011      | 0.036      |

**Supplementary Table 9. Composite lesion score (CLS) on four tissues from inbred C57BL/6Jnia male mice and f1a hybrid C57BL/6Jnia:Balb/cBy mice at four ages.** Shown is the mean ± standard deviation (n=8 mice per strain), unpaired two-tailed Student's t test. ns not significant.

| Strain               | 8 months  | 16 months  | 24 months | 32 months |
|----------------------|-----------|------------|-----------|-----------|
| <b>HEART</b>         |           |            |           |           |
| C57BL/6Jnia          | 0.9 ± 0.5 | 1.0 ± 0.75 | 4.0 ± 1.1 | 4.9 ± 1.2 |
| C57BL/6Jnia:Balb/cBy | 0.6 ± 0.7 | 1.3 ± 1.0  | 3.3 ± 0.4 | 4.4 ± 1.2 |
| <i>p</i> value       | ns        | ns         | 0.090     | ns        |
| <b>LUNG</b>          |           |            |           |           |
| C57BL/6Jnia          | 1.6 ± 0.5 | 1.5 ± 0.9  | 3.1 ± 0.8 | 4.5 ± 0.9 |
| C57BL/6Jnia:Balb/cBy | 0.8 ± 0.7 | 1.4 ± 0.7  | 2.8 ± 0.4 | 5.0 ± 0.5 |
| <i>p</i> value       | 0.014     | ns         | ns        | ns        |
| <b>LIVER</b>         |           |            |           |           |
| C57BL/6Jnia          | 1.5 ± 0.8 | 1.1 ± 0.4  | 5.0 ± 1.4 | 5.6 ± 0.6 |
| C57BL/6Jnia:Balb/cBy | 1.3 ± 0.4 | 1.3 ± 0.5  | 3.1 ± 0.5 | 4.2 ± 0.9 |
| <i>p</i> value       | ns        | ns         | 0.0022    | 0.0007    |
| <b>KIDNEY</b>        |           |            |           |           |
| C57BL/6Jnia          | 1.3 ± 0.7 | 1.3 ± 1.0  | 3.5 ± 0.9 | 5.5 ± 1.1 |
| C57BL/6Jnia:Balb/cBy | 1.1 ± 0.5 | 1.3 ± 1.1  | 2.1 ± 0.8 | 3.8 ± 1.2 |
| <i>p</i> value       | ns        | ns         | 0.0075    | 0.0064    |

**Supplementary Table 10. All significant proteins for the male *Ercc1*<sup>-/-</sup> f1b C57BL/6J:FVB/NJ via one-way ANOVA analysis with a false discovery rate of 5%. Shown for each protein is the mean expression of that protein at a particular age relative to expression of that protein in C57BL/6Jnia male mice at 8 months of age.**

|                  | 2 months    |            | 3 months    |            | 4 months    |            |
|------------------|-------------|------------|-------------|------------|-------------|------------|
|                  | <i>Mean</i> | <i>SEM</i> | <i>Mean</i> | <i>SEM</i> | <i>Mean</i> | <i>SEM</i> |
| <i>AGXT2</i>     | 0.97        | 0.02       | 1.11        | 0.02       | 1.18        | 0.03       |
| <i>AOX3</i>      | 1.22        | 0.05       | 0.95        | 0.04       | 0.92        | 0.05       |
| <i>ATP5I</i>     | 1.19        | 0.07       | 0.96        | 0.04       | 0.86        | 0.03       |
| <i>CA3</i>       | 1.19        | 0.06       | 0.82        | 0.03       | 0.75        | 0.02       |
| <i>CAT</i>       | 1.16        | 0.04       | 1.02        | 0.03       | 0.95        | 0.03       |
| <i>CCT2</i>      | 1.19        | 0.09       | 1.11        | 0.02       | 0.90        | 0.06       |
| <i>CERCAM</i>    | 1.19        | 0.12       | 0.50        | 0.06       | 0.64        | 0.10       |
| <i>CERS2</i>     | 1.31        | 0.05       | 0.97        | 0.08       | 0.90        | 0.05       |
| <i>CES3A</i>     | 1.27        | 0.01       | 1.11        | 0.04       | 0.95        | 0.04       |
| <i>COMT</i>      | 1.34        | 0.04       | 1.01        | 0.04       | 1.01        | 0.04       |
| <i>COX7A2</i>    | 1.18        | 0.03       | 0.96        | 0.03       | 0.96        | 0.02       |
| <i>CTNNA1</i>    | 1.45        | 0.12       | 0.87        | 0.05       | 0.91        | 0.09       |
| <i>EEF2</i>      | 1.15        | 0.02       | 0.97        | 0.02       | 0.98        | 0.01       |
| <i>EGFR</i>      | 1.08        | 0.03       | 0.91        | 0.04       | 0.81        | 0.02       |
| <i>ELAVLI</i>    | 1.31        | 0.05       | 0.81        | 0.06       | 1.02        | 0.04       |
| <i>FABP1</i>     | 1.39        | 0.17       | 0.82        | 0.06       | 0.79        | 0.06       |
| <i>FBP1</i>      | 1.21        | 0.03       | 0.96        | 0.03       | 0.89        | 0.04       |
| <i>GBE1</i>      | 1.08        | 0.04       | 0.77        | 0.04       | 0.88        | 0.03       |
| <i>GLUL</i>      | 1.16        | 0.04       | 0.78        | 0.03       | 0.94        | 0.01       |
| <i>GM5745</i>    | 1.17        | 0.04       | 0.99        | 0.02       | 1.01        | 0.03       |
| <i>GPD2</i>      | 1.56        | 0.07       | 0.97        | 0.04       | 1.00        | 0.04       |
| <i>H3F3A</i>     | 1.31        | 0.07       | 0.87        | 0.06       | 1.00        | 0.05       |
| <i>HIST1H1E</i>  | 1.37        | 0.09       | 0.83        | 0.04       | 0.95        | 0.06       |
| <i>HIST1H2AL</i> | 1.31        | 0.03       | 0.81        | 0.06       | 0.83        | 0.09       |
| <i>HIST1H4A</i>  | 1.33        | 0.06       | 0.81        | 0.03       | 0.93        | 0.05       |
| <i>HSP90B1</i>   | 1.17        | 0.03       | 0.98        | 0.02       | 0.91        | 0.04       |
| <i>HSPAIL</i>    | 1.14        | 0.01       | 1.01        | 0.02       | 1.01        | 0.02       |
| <i>HYOU1</i>     | 1.18        | 0.02       | 1.00        | 0.01       | 0.93        | 0.03       |
| <i>INMT</i>      | 1.36        | 0.17       | 0.77        | 0.05       | 0.58        | 0.05       |
| <i>IVD</i>       | 0.85        | 0.06       | 1.13        | 0.03       | 1.21        | 0.05       |
| <i>LACTB2</i>    | 1.06        | 0.02       | 0.89        | 0.01       | 0.84        | 0.02       |
| <i>LDHD</i>      | 0.79        | 0.01       | 1.15        | 0.05       | 1.07        | 0.04       |
| <i>MSRA</i>      | 1.05        | 0.04       | 0.82        | 0.03       | 0.76        | 0.05       |
| <i>MUP10</i>     | 1.35        | 0.09       | 0.92        | 0.03       | 0.67        | 0.07       |
| <i>NUDT7</i>     | 1.37        | 0.06       | 0.98        | 0.04       | 0.86        | 0.04       |
| <i>PAQR9</i>     | 1.60        | 0.04       | 0.81        | 0.08       | 0.98        | 0.06       |

|               |                 |            |                 |            |                 |            |
|---------------|-----------------|------------|-----------------|------------|-----------------|------------|
| <i>PCYT2</i>  | 1.24            | 0.07       | 0.83            | 0.06       | 0.97            | 0.06       |
| <i>PSMB4</i>  | 1.22            | 0.01       | 1.00            | 0.05       | 0.96            | 0.05       |
|               | <b>2 months</b> |            | <b>3 months</b> |            | <b>4 months</b> |            |
|               | <i>Mean</i>     | <i>SEM</i> | <i>Mean</i>     | <i>SEM</i> | <i>Mean</i>     | <i>SEM</i> |
| <i>PYGB</i>   | 1.08            | 0.03       | 0.88            | 0.03       | 0.87            | 0.03       |
| <i>RPL13A</i> | 1.21            | 0.06       | 0.90            | 0.04       | 1.00            | 0.04       |
| <i>RPN2</i>   | 1.16            | 0.04       | 1.00            | 0.02       | 0.90            | 0.03       |
| <i>RPS20</i>  | 1.21            | 0.04       | 0.91            | 0.03       | 0.95            | 0.06       |
| <i>TF</i>     | 1.15            | 0.04       | 0.86            | 0.05       | 0.89            | 0.04       |
| <i>THRSP</i>  | 1.76            | 0.23       | 0.73            | 0.06       | 0.78            | 0.09       |
| <i>UGDH</i>   | 0.87            | 0.06       | 1.20            | 0.05       | 1.23            | 0.05       |
| <i>UOX</i>    | 1.08            | 0.04       | 0.86            | 0.06       | 0.75            | 0.04       |

**Supplementary Table 11.** All significant proteins for the female *Ercc1*<sup>-/-</sup> f1b C57BL/6J:FVB/NJ via one-way ANOVA analysis with a false discovery rate of 5%. Shown for each protein is the mean expression of that protein at a particular age relative to expression of that protein in C57BL/6Jnia male mice at 8 months of age.

|                      | <b>2 months</b> |            | <b>3 months</b> |            | <b>4 months</b> |            |
|----------------------|-----------------|------------|-----------------|------------|-----------------|------------|
|                      | <i>Mean</i>     | <i>SEM</i> | <i>Mean</i>     | <i>SEM</i> | <i>Mean</i>     | <i>SEM</i> |
| <i>9030617003RIK</i> | 0.93            | 0.05       | 1.28            | 0.05       | 1.09            | 0.03       |
| <i>AACS</i>          | 1.26            | 0.07       | 0.92            | 0.16       | 0.79            | 0.04       |
| <i>AASS</i>          | 0.73            | 0.08       | 1.17            | 0.11       | 1.41            | 0.16       |
| <i>ABCC3</i>         | 0.85            | 0.09       | 1.45            | 0.13       | 1.24            | 0.12       |
| <i>ACAD8</i>         | 0.86            | 0.06       | 1.10            | 0.05       | 1.13            | 0.05       |
| <i>ACAT1</i>         | 1.08            | 0.07       | 0.97            | 0.05       | 0.65            | 0.08       |
| <i>ACOX2</i>         | 0.89            | 0.05       | 1.38            | 0.11       | 1.49            | 0.08       |
| <i>ACSL1</i>         | 1.07            | 0.03       | 0.87            | 0.03       | 0.72            | 0.04       |
| <i>AKRID1</i>        | 0.94            | 0.04       | 1.16            | 0.05       | 1.08            | 0.03       |
| <i>ALDH3A2</i>       | 0.71            | 0.09       | 1.22            | 0.09       | 1.16            | 0.11       |
| <i>ALDH7A1</i>       | 0.96            | 0.03       | 1.07            | 0.02       | 1.16            | 0.03       |
| <i>ALDH9A1</i>       | 0.87            | 0.02       | 0.99            | 0.04       | 0.99            | 0.01       |
| <i>ASPDH</i>         | 0.97            | 0.04       | 0.94            | 0.03       | 0.74            | 0.03       |
| <i>ATP6VIA</i>       | 0.99            | 0.03       | 1.03            | 0.05       | 1.25            | 0.07       |
| <i>BLMH</i>          | 1.05            | 0.04       | 0.94            | 0.03       | 0.54            | 0.10       |
| <i>CA3</i>           | 1.42            | 0.07       | 0.79            | 0.04       | 0.52            | 0.08       |
| <i>CAT</i>           | 1.09            | 0.05       | 1.00            | 0.03       | 0.83            | 0.03       |
| <i>CBR1</i>          | 0.78            | 0.03       | 1.17            | 0.12       | 1.30            | 0.11       |
| <i>CCBL1</i>         | 1.11            | 0.06       | 0.90            | 0.08       | 0.71            | 0.05       |
| <i>CDH2</i>          | 0.79            | 0.06       | 0.81            | 0.07       | 1.70            | 0.25       |
| <i>CES3A</i>         | 1.74            | 0.23       | 0.91            | 0.09       | 0.82            | 0.07       |

|                  |                 |            |                 |            |                 |            |
|------------------|-----------------|------------|-----------------|------------|-----------------|------------|
| <i>CTH</i>       | 0.88            | 0.05       | 1.07            | 0.06       | 1.41            | 0.14       |
| <i>CTSD</i>      | 0.79            | 0.07       | 0.94            | 0.06       | 1.16            | 0.05       |
| <i>CYB5A</i>     | 0.92            | 0.03       | 1.21            | 0.09       | 1.14            | 0.03       |
| <i>CYP2J5</i>    | 0.94            | 0.03       | 1.12            | 0.01       | 1.17            | 0.06       |
| <i>CYP3A13</i>   | 0.87            | 0.05       | 1.23            | 0.08       | 1.13            | 0.04       |
| <i>DHRS1</i>     | 0.86            | 0.04       | 1.20            | 0.07       | 1.19            | 0.08       |
| <i>DLAT</i>      | 0.76            | 0.06       | 1.04            | 0.04       | 1.05            | 0.07       |
| <i>DMGDH</i>     | 0.84            | 0.03       | 0.97            | 0.04       | 1.04            | 0.03       |
| <i>DPYD</i>      | 1.07            | 0.05       | 0.78            | 0.08       | 0.79            | 0.06       |
| <i>ECHDC2</i>    | 0.92            | 0.04       | 1.14            | 0.03       | 1.31            | 0.09       |
| <i>ENTPD5</i>    | 0.85            | 0.05       | 1.32            | 0.10       | 1.45            | 0.16       |
| <i>EPHX1</i>     | 0.91            | 0.04       | 1.36            | 0.10       | 1.34            | 0.12       |
| <i>FMO5</i>      | 0.92            | 0.05       | 1.43            | 0.05       | 2.00            | 0.23       |
| <i>GLUL</i>      | 1.10            | 0.05       | 0.78            | 0.07       | 0.81            | 0.04       |
| <i>GPT2</i>      | 0.97            | 0.03       | 1.12            | 0.01       | 1.25            | 0.07       |
| <i>GSTMI</i>     | 0.92            | 0.04       | 1.30            | 0.09       | 1.47            | 0.16       |
| <i>GSTT3</i>     | 0.79            | 0.03       | 0.89            | 0.07       | 1.12            | 0.03       |
|                  | <b>2 months</b> |            | <b>3 months</b> |            | <b>4 months</b> |            |
|                  | <i>Mean</i>     | <i>SEM</i> | <i>Mean</i>     | <i>SEM</i> | <i>Mean</i>     | <i>SEM</i> |
| <i>GYK</i>       | 0.93            | 0.03       | 1.18            | 0.05       | 1.24            | 0.05       |
| <i>HIBADH</i>    | 0.74            | 0.08       | 1.07            | 0.03       | 1.05            | 0.07       |
| <i>HNMT</i>      | 0.89            | 0.05       | 1.01            | 0.05       | 1.34            | 0.03       |
| <i>HSD17B13</i>  | 0.95            | 0.01       | 1.18            | 0.04       | 1.13            | 0.04       |
| <i>IIGPI</i>     | 1.08            | 0.05       | 1.04            | 0.01       | 0.90            | 0.02       |
| <i>MVP</i>       | 0.87            | 0.03       | 1.19            | 0.11       | 1.29            | 0.07       |
| <i>NAPRT1</i>    | 0.86            | 0.04       | 1.03            | 0.02       | 1.11            | 0.07       |
| <i>NUDT7</i>     | 2.02            | 0.39       | 0.76            | 0.10       | 0.78            | 0.14       |
| <i>PKLR</i>      | 1.07            | 0.07       | 0.87            | 0.08       | 0.75            | 0.02       |
| <i>PPAI</i>      | 0.82            | 0.02       | 1.09            | 0.03       | 1.19            | 0.06       |
| <i>PSMA2</i>     | 0.91            | 0.04       | 1.23            | 0.07       | 1.22            | 0.07       |
| <i>PSMA7</i>     | 0.90            | 0.05       | 1.15            | 0.03       | 0.99            | 0.02       |
| <i>PTGR2</i>     | 0.89            | 0.02       | 1.09            | 0.07       | 1.10            | 0.04       |
| <i>PYGB</i>      | 1.01            | 0.05       | 0.94            | 0.04       | 0.80            | 0.01       |
| <i>RPL4</i>      | 1.05            | 0.02       | 1.00            | 0.02       | 0.88            | 0.01       |
| <i>RPL5</i>      | 1.05            | 0.02       | 0.89            | 0.04       | 0.98            | 0.02       |
| <i>RPLP2</i>     | 1.10            | 0.03       | 0.95            | 0.03       | 0.94            | 0.04       |
| <i>RPS23</i>     | 1.16            | 0.06       | 0.91            | 0.05       | 0.89            | 0.03       |
| <i>RPS5</i>      | 1.05            | 0.03       | 0.91            | 0.03       | 0.90            | 0.03       |
| <i>RTN4</i>      | 0.88            | 0.07       | 1.43            | 0.09       | 1.24            | 0.14       |
| <i>SCPEPI</i>    | 0.90            | 0.03       | 1.46            | 0.15       | 1.46            | 0.15       |
| <i>SERPINA3G</i> | 1.27            | 0.12       | 0.73            | 0.08       | 0.76            | 0.04       |

|                 |      |      |      |      |      |      |
|-----------------|------|------|------|------|------|------|
| <i>SH3BGRL</i>  | 0.84 | 0.04 | 1.21 | 0.06 | 0.92 | 0.05 |
| <i>SLC25A10</i> | 0.86 | 0.07 | 1.19 | 0.05 | 1.26 | 0.11 |
| <i>STT3A</i>    | 1.08 | 0.04 | 0.98 | 0.03 | 0.86 | 0.05 |
| <i>SULT1A1</i>  | 0.82 | 0.05 | 1.25 | 0.07 | 1.30 | 0.11 |
| <i>TLN1</i>     | 0.92 | 0.03 | 1.06 | 0.02 | 1.08 | 0.03 |
| <i>TTC38</i>    | 0.98 | 0.04 | 1.10 | 0.04 | 1.18 | 0.05 |
| <i>UOX</i>      | 1.08 | 0.06 | 0.93 | 0.07 | 0.79 | 0.01 |
| <i>VATI</i>     | 0.79 | 0.10 | 1.05 | 0.04 | 1.47 | 0.10 |
| <i>YBX1</i>     | 1.12 | 0.09 | 0.74 | 0.03 | 0.99 | 0.05 |

**Supplementary Table 12. Details of the liver samples from the rapamycin study used for proteomics analysis.**

| Genotype :               | WT            | WT            | WT            | WT            | WT            | WT            | WT            | WT            |
|--------------------------|---------------|---------------|---------------|---------------|---------------|---------------|---------------|---------------|
| Strain:                  | C57BL/6N<br>J | C57BL/6N<br>J | C57BL/6N<br>J | C57BL/6N<br>J | C57BL/6N<br>J | C57BL/6N<br>J | C57BL/6N<br>J | C57BL/6N<br>J |
| Sex:                     | Male          | Male          | Female        | Female        | Male          | Male          | Female        | Female        |
| Diet:                    | Control*      | Rapamycin     | Control       | Rapamycin     | Control       | Rapamycin     | Control       | Rapamycin     |
| Dose (ppm):              | 0             | 42            | 0             | 14            | 0             | 42            | 0             | 14            |
| Duration :               | 8             | 8             | 8             | 8             | 16            | 16            | 16            | 16            |
| Age <sup>§</sup> (mths): |               |               |               |               |               |               |               |               |
| 24                       |               |               | 6             | 6             |               |               |               |               |
| 26                       | 6             | 8             |               |               |               |               | 8             | 7             |
| 28                       |               |               |               |               | 8             | 7             |               |               |

\*prepared diet including encapsulation material

<sup>§</sup>Age when mice were euthanized to collect tissue for proteomic analysis.

**Supplementary Table 13. The table delineates the number of liver samples from the rapamycin study used for proteomics analysis.** Identified features are the number of mass spectrometric signals that passed occupancy and outlier filtering and were associated with a peptide and protein. The results of a Student's unpaired, equal variance t-test analysis between control and rapamycin treated individuals is shown at varying statistical stringencies. Minimum significance cutoff for a false discovery rate of <5% is shown in red.

|                     | Total all groups | male 8 wks | male 16 wks | Female 8 wks | Female 16 wks |
|---------------------|------------------|------------|-------------|--------------|---------------|
| # livers            | 56               | 14         | 15          | 12           | 15            |
| Identified features |                  | 30,963     | 34,730      | 30,234       | 30,368        |
| Quantified proteins | 1,641            | 1,581      | 1,561       | 1,500        | 1,500         |
| Student's t-test:   |                  |            |             |              |               |
| p<0.05              |                  | 127        | 164         | 101          | 137           |
| p<0.01              |                  | 26         | 62          | 53           | 36            |
| p<0.001             |                  | 7          | 18          | 14           | 2             |
| p<0.0001            |                  | 2          | 3           | 3            | 0             |

**Supplementary Table 14. The biological age calculator uses a rudimentary linear model that weighted each of the 14 proteins equally.** The table shows the relative expression level and linear correlation coefficient in reference mice to for the panel of 14 selected proteins in the biological age calculator.

|         | Months of age |      |      | r <sup>2</sup> |
|---------|---------------|------|------|----------------|
|         | 16            | 24   | 32   |                |
| ACSL1   | 1.09          | 0.91 | 0.81 | 0.973          |
| AOX3    | 1.1           | 0.89 | 0.66 | 0.999          |
| CA3     | 1.12          | 0.84 | 0.56 | 0.999          |
| CBS     | 0.97          | 0.98 | 1.22 | 0.78           |
| CES3G   | 1.04          | 0.98 | 0.79 | 0.917          |
| CROT    | 1.05          | 0.93 | 0.82 | 0.999          |
| CYP2C44 | 0.87          | 1.07 | 1.27 | 0.999          |
| ECH1    | 1.15          | 0.97 | 0.84 | 0.991          |
| ECI1    | 1.09          | 0.88 | 0.8  | 0.937          |
| GGCX    | 0.96          | 1.23 | 1.17 | 0.549          |
| GLO1    | 1.12          | 0.98 | 0.72 | 0.971          |
| POR     | 0.96          | 1.07 | 1.2  | 0.998          |
| SDS     | 0.87          | 1.02 | 1.44 | 0.93           |
| SULT1A1 | 0.97          | 1.14 | 1.46 | 0.97           |

**Supplementary Table 15. Kruskal-Wallis and Jonckheere-Terprstra significance trend test for the panel of 14 selected proteins in male inbred mouse livers.**

|         | Kruskal-Wallis test | Jonckheere-Terprstra Test |
|---------|---------------------|---------------------------|
|         | p-value             |                           |
| Acs11   | 9.40E-04            | 6.10E-05                  |
| Aox3    | 9.10E-05            | 2.40E-07                  |
| Ca3     | 4.30E-05            | 4.84E-07                  |
| CBS     | 5.37E-04            | 2.02E-05                  |
| CES3G   | 9.76E-04            | 1.37E-05                  |
| CROT    | 3.86E-03            | 5.70E-05                  |
| CYP2C44 | 6.82E-03            | 1.63E-03                  |
| ECH1    | 3.10E-03            | 1.00E-03                  |
| ECI1    | 2.03E-03            | 4.93E-04                  |
| GGCX    | 5.43E-03            | 3.36E-04                  |
| GLO1    | 4.54E-04            | 2.13E-04                  |
| POR     | 1.30E-04            | 2.56E-07                  |
| SDS     | 1.21E-03            | 1.63E-03                  |
| SULT1A1 | 2.17E-05            | 3.50E-08                  |
